# Supplementary material for: The Diurnal Logic of the Expression of the Chloroplast Genome in Chlamydomonas reinhardtii
Source: PLoS One. 2014 Oct 1;9(10):e108760. doi: 10.1371/journal.pone.0108760 (PMC4182738; doi:10.1371/journal.pone.0108760)
Supplement: Dataset S1 — List of genes, PCR primers, gene functions, gene classifications, and associations with clusters. (XLSX) [file pone.0108760.s002.xlsx]

## Sheet: Sheet1
Gene	Forward primer	Reverse primer	Genome	Classification	Cluster	Locus tag/name	Function
petA	TTTACGCGCAGCAACATTAG	TGCTTTTTGCGCTAAGTGAC	cp	PS	3	ChreCp001	Cyt b6f
ORF112	AAAGTTCCTCCACTGCCTCCTTC	AATACTTCGCAACTGCCACTGAC	cp	Other	3	NC_005353 4178..4516	Unknown
petD	ACTTACGGTGAACCTGCTTG	GTTTGCTGGCTCACCCATAG	cp	PS	3	ChreCp002	Cyt b6f
chlB	TGCGGATTGGTTTAGAGAGC	CGTGACGTTCCATTTGTGTC	cp	PS	3	ChreCp003	Chlorophyll biogenesis
psbK	TGAAGCATACGCACCATTTGCAC	CGGAAACTAACAGCTGCTTGCC	cp	PS	3	ChreCp004	PSII
tufA	TACATCCCAACTCCACAACG	AATGCACCACGTTCTACACG	cp	Other	2	ChreCp005	Translation elongation factor
rpl20	CACATACGACGGAAATCACG	TTTAGAGGCGCTGCTTCAAC	cp	Ribo	1	ChreCp006	Large ribosomal subunit
clpP	TCCACAGATTGACGTTTTGC	GGCACCGCAAAAACAAAAG	cp	Other	2	ChreCp007	Protease
petB	TGTTCCTGATGCAATCCCAGGTG	AGTTGCTTGACCAACACCAACAC	cp	PS	3	ChreCp008	Cyt b6f
chlL	TGTTGTTTGTGGTGGCTTTGCTG	CCCGCTAAACGCAATGGATGTG	cp	PS	3	ChreCp009	Chlorophyll biogenesis
rpl23	ACGCATATTCCACCACGTCAAA	ACGTGGACGATAACCTTGTGCT	cp	Ribo	2	ChreCp011	Large ribosomal subunit
rpl2	CAGTACGTGGTTCGGTGATG	ACCCCATGGTGTAACTGGAC	cp	Ribo	2	ChreCp012	Large ribosomal subunit
rps19	GGTGTTTATAATGGGCGTGA	CATGGCCACGATATGTACG	cp	Ribo	2	ChreCp013	Small ribosomal subunit
rpl16	ACCACACCGTGGTCATTTAAGAGG	CGTCCGGCTTCAATTTGACGTG	cp	Ribo	2	ChreCp014	Large ribosomal subunit
rpl14	TCTTGGTGGCAGTTATCGTG	CCATTTTCACGACGGATACC	cp	Ribo	3	ChreCp015	Large ribosomal subunit
rpl5	AGACAACAAATGCCCGTAGGTG	AAATCGCGTACACGCGGTAATG	cp	Ribo	3	ChreCp016	Large ribosomal subunit
rps8	CCAGGTTTACGCATTTATTCA	CACGTAGACGAGCTTCACGA	cp	Ribo	2	ChreCp017	Small ribosomal subunit
psaA	TGGGGTACGGTTACAGCTTC	TGTGCCCATAAGAAGTCACG	cp	PS	3	ChreCp019	PSI
rps4	AATATGGCACCTACAATTCCAGCA	TGTCCATGACTAATAAGTTGGCGT	cp	Ribo	2	ChreCp020	Small ribosomal subunit
psbA	CATCCTTATGCACCCATTCC	TGACCGAAACGGTAACCTTC	cp	PS	2	ChreCp021	PSII
ORF59	TGTGGGATGACCGGTTAGGTACTC	AAACTGCCATACCGACCAAGCG	cp	Other	2	NC_005353 57798..57977	Unknown
ORF50	ATCGAAGGACGTCCCAAAGAGG	TGTGGTCTGGCTACGAACTGTG	cp	Other	1	NC_005353 58848..59000	Unknown
atpE	TGCTTATCCGTGGTGGTCAAGC	CAGCAGAAACGGCTTCGTTAGC	cp	PS	2	ChreCp023	ATP synthase
rps7	TCGCGCTCGAGCTAACTCATTAC	TGGTTGACCTGAGCGCTTATCG	cp	Ribo	2	ChreCp024	Small ribosomal subunit
rps14	CAGCAGTGCGTTTACACAACCG	GCCTTTAGGACGGCCTGTAATCA	cp	Ribo	2	ChreCp025	Small ribosomal subunit
psbZ	TCCTTCAAGTTGCCCTACTTGCTT	GTCAGTCCAACCATTAGGAGTTGC	cp	PS	3	ChreCp027	PSII
ccsA	CCATTCGTTCCGTTAGCTTC	TATCCTGACGGGTTTCAAGC	cp	Other	2	ChreCp028	Cyt c biogenesis
psbH	TGGCAACAGGAACTTCTAAAGCTA	CCTGCTTCTGAGTTAAGTGGACG	cp	PS	3	ChreCp029	PSII
psbB	AGCAGTATTCTGGGCAGCTTTCG	AGTAGCTGCTGAACCGTACCAC	cp	PS	3	ChreCp032	PSII
rpoA	GCCCACGTGTAATTAAAGCCGC	ACACATTGTAAACCTGCTGGTAGT	cp	PEP	1	ChreCp033	Plastid-encoded RNA polymerase
rps2	ATTTGACGCAGACTTGAACG	TGGTTCAGCAGGCAATTTAAC	cp	Ribo	3	ChreCp034	Small ribosomal subunit
rps18	CAAACGGTAACAAGCCCATT	GAAGACAAACACGTTTAACAGC	cp	Ribo	2	ChreCp036	Small ribosomal subunit
ycf3	AACTGCGATCGTAAGCATCC	ATGTCAGCACAAGCTGAAGG	cp	Other	2	ChreCp037	PSI assembly
ycf4	AAAACCACCACCAACATTCC	TGTTCCGTTTTTCCCACAAG	cp	Other	2	ChreCp038	PSI assembly
rps9	TAGCTAAAGCTTCGCCTTCC	TTAATGGGCCAAACTGAAGC	cp	Ribo	2	ChreCp039	Small ribosomal subunit
psbE	TTCATTTGGACGTGGAGTACC	TGGCTGGTAAACCAGTAGAGC	cp	PS	3	ChreCp040	PSII
rpoB-2	CCCACGGCATATAAGCTACG	ACCAGCGGTTAAAGAAGGTG	cp	PEP	1	ChreCp041	Plastid-encoded RNA polymerase
rpoB-1	TCAGCCACGTTAGCCATTCGAG	GGGTTTCAACGGGACAAATACGAC	cp	PEP	1	ChreCp042	Plastid-encoded RNA polymerase
rps3	TCAAGCAATGGCCAATGAATCACG	CTTTACGAGCAGTCGCAATTGTTG	cp	Ribo	2	ChreCp046	Small ribosomal subunit
rpoC2	TCAGGCAGGGAAAGTGCTAC	ATGGCCTTTGTTCCAGATTG	cp	PEP	1	ChreCp047	Plastid-encoded RNA polymerase
psaB	TCCAGAATCACGTGGTCAAC	TGAGCAGTACCGAAAACGTG	cp	PS	3	ChreCp048	PSI
rbcL	TCGTGAAGGTGGCGACGTAATTC	CACATGCAGCAGCAAGTTCTGG	cp	PS	2	ChreCp049	Rubisco
atpA	GGCTAACGCTAACGAACCAG	TCACGGTAAGCTTGTGCTTG	cp	PS	2	ChreCp050	ATP synthase
cemA	GGGATCGCGAAGGTGAAGAAAC	TCGCAAGTTTGCACCAATAACACG	cp	Other	3	ChreCp052	Membrane protein
atpH	TGGTCCTGGTATGGGTCAAG	CCACGGATTTTACCTTCAGC	cp	PS	1	ChreCp053	ATP synthase
atpF	GCCGCACGTACGCAATTAGAAAC	ACCTTCTTCACGGATTTCTTGTGC	cp	PS	3	ChreCp054	ATP synthase
rps11	TTTAGTAACAGGCCCGGGTCAAGG	TCGGTGGACGACAACCATTGTG	cp	Ribo	2	ChreCp055	Small ribosomal subunit
chlN	TGTTAGATGGTGCCACAACG	ACAGCTAATCGGGCAAAAAG	cp	PS	2	ChreCp056	Chlorophyll biogenesis
atpB	TTTACCACCACGACGGTATG	ACCGTACAGCTCCTGCTTTC	cp	PS	2	ChreCp058	ATP synthase
ORF1995	CAACTAAAGCTGCAAGTGGACCTC	ACGGGCTTCAGCTGGATTAGTTTG	cp	Other	1	ChreCp059	Unknown
rps12	TGCACTTCGTAAAGTTGCTAGGG	GGCCAACACCTGGAATATAAGCTG	cp	Ribo	2	ChreCp060	Small ribosomal subunit
psaJ	CAAGTGGATCAGGGAAATAACG	TCAACAGCACCTGTAATTGCTA	cp	PS	2	ChreCp061	PSI
atpI	TAAGCACCCGCTAAAGTTGC	TGAACTTGTTGTTGGCGTTC	cp	PS	3	ChreCp062	ATP synthase
psbD	GCCTGTGTAGGGTTGAATGC	TGCTGGTGTTTTAGGTGCTG	cp	PS	3	ChreCp064	PSII
ORF2971	TCTGTACCTGCTGGTGCTAGTG	ACGTGAACTCGATTGTGCTACTGG	cp	Other	2	ChreCp065	Unknown
psbC	AATTGTTTTCTGGGCAGGTG	CCTAAAGTTGCGATGTGTGG	cp	PS	3	ChreCp066	PSII
psaC	GGTTCCATGGGATGGTTGTAAAGC	ACACAGTCTTCAGTGCGTGGAG	cp	PS	3	ChreCp067	PSI
rpoC1b	CAAATATTGGCGGAATCGAC	GTAGTGCCCGAAAAAGATGC	cp	PEP	1	ChreCp069	Plastid-encoded RNA polymerase
rpoC1a	AACCAAACATGGGTTGTTGG	AGCGGAAAGTCGTCAAACAC	cp	PEP	1	ChreCp070	Plastid-encoded RNA polymerase
rrnS	TGGAGGAAGGTGAGGATGAC	TTCATGTAGGCGAGTTGCAG	cp	Ribo	2	ChreCr001	Ribosomal RNA
rrn7	AGACGAAGAAGGGCGCAGATAC	GGATCAAAGCTTGTTGCCAGCTC	cp	Ribo	1	ChreCr002	Ribosomal RNA
rrnL	AAACGTCGTGAGACAGTTTGGTC	AGCTACCCAGCGTTTCCCATTG	cp	Ribo	3	ChreCr004	Ribosomal RNA
rrn5	TCAGTTGGACCCACACCAATCC	ACGGCGACCCGTAAAGTTCTTC	cp	Ribo	1	ChreCr005	Ribosomal RNA
tscA	TCCAACTTCAGCTAGGTTTGATGT	ACGAAAGACCACAATAAGCCCT	cp	Other	1	ChreCs001	psaA trans-splicing
ORF140	CAAGGCTTTGGCTTGTTAGGAAAC	GCTTCTTGGATTTCCAGCGCAT	cp	Other	2	NC_005353 484..906	Unknown
ORF271	AAAACCGACAAGAAAGGAACC	GCAAAAGGTTGGGAAACAAG	cp	Other	2	NC_005353 -393..422	Unknown
cob	CGCAAGATCATACCAGAAGG	TTCTTGGAACGGTGGTTCTC	mt	N/A	N/A	ChrepMp01	Complex III
nad4	TGCTTACGTGTTCTGCGTATGCC	ACACGGTTGAAAGCCCAGAAGC	mt	N/A	N/A	ChrepMp02	Complex I
nad5	CAGCCATAAAAGCGGTCAAG	CCTAATTCACGCCGCTACTC	mt	N/A	N/A	ChrepMp03	Complex I
cox1	CGCTATGGGTGCCATTAGTTTGC	AGGCCGACGGTAAACATGTGATG	mt	N/A	N/A	ChrepMp04	Complex IV
nad2	GCTTGCCACCATTTGCAGGTTTC	CGCTCATAGCATGCCAGAAGATCC	mt	N/A	N/A	ChrepMp05	Complex I
nad6	TGCTACTAGAGATCCCAGCCACTG	CCCAAAGTACTCCAACCACGACTG	mt	N/A	N/A	ChrepMp06	Complex I
nad1	TCATGCGCCTAGGTTGGAAAGC	AGCATGCAAGGCGAAGAAAGCC	mt	N/A	N/A	ChrepMp07	Complex I
rtl	TACGCCGACAGTACATCCAG	TACCAAAACCAGGACGGAAG	mt	N/A	N/A	ChrepMp08	Reverse transcriptase-like protein
rrnL6	ACGTTCTGGAACAATTACGCTGA	GGGCTTACGGCCATGTTATCCA	mt	N/A	N/A	ChrepMr09	Ribosomal RNA
rrnS1	GTTTGGTGCTGGCTCAGCTTTC	ATTACGCACTCGTGGCCTTAATC	mt	N/A	N/A	ChrepMr10	Ribosomal RNA
rrnL5	AAGGTAGAGTCTGCGTTGAACACC	TTCCAAGCACAGTGGCTGCTTC	mt	N/A	N/A	ChrepMr11	Ribosomal RNA
rrnL7	ACGTTTAATTGGCGTCCTTG	AGCTGCATAGGGTCTCTTCG	mt	N/A	N/A	ChrepMr12	Ribosomal RNA
rrnS2	CCCATGGCTTATCCTTAGCCTGTC	ATCCGCCGTTCAAGCGATTGTC	mt	N/A	N/A	ChrepMr13	Ribosomal RNA
rrnL3a	ACTCAATTTCGGTGCTCGGTGA	GGGTCCCAGTACTAAGCCAGTAA	mt	N/A	N/A	ChrepMr14	Ribosomal RNA
rrnL3b	AACCGATCGATCTAGCGACGTG	TCTTGCAACAGACACGGGTTCG	mt	N/A	N/A	ChrepMr15	Ribosomal RNA
rrnL8	CGCAAGGGTTGGATTGTTCGTC	AGAAACCGACCTGTCTCACGAC	mt	N/A	N/A	ChrepMr16	Ribosomal RNA
rrnS3	ATTCCGGATGGAAAGCCGAAGG	CGCTACCCAAACTTACGCGTTG	mt	N/A	N/A	ChrepMr17	Ribosomal RNA
rrnL4	ATACCGGTAGCGCAAGCGAATG	TGACCTTACCGCCGATTGTCTG	mt	N/A	N/A	ChrepMr18	Ribosomal RNA
rrnS4	ACGGTCGAGCAAGTCATCATGG	TGGTATCCAACTTGTGGGTGTCC	mt	N/A	N/A	ChrepMr19	Ribosomal RNA
rrnL1	AAGGGATTGCTGACTGATAGTGC	ATGCGCGAATGCTCACGTATTG	mt	N/A	N/A	ChrepMr20	Ribosomal RNA
rrnL2b	GCGTGCAACAACACACTAAAGGG	TGTGAGAGTGTGGGTTGAACCAG	mt	N/A	N/A	ChrepMr22	Ribosomal RNA
IF3	ATGCGCATGCGTTATGACGACCTC	AAACACCTCCTTCACCGTGATGCC	nu	Ribo	2	Cre01.g001550	Translation initiation factor
RF3	AAGGTGACGCCGGTGTTCTTTG	TGAAGGTCTGCAGGAACAGCTC	nu	Ribo	2	Cre01.g006150	Translation release factor
PDI2	CGGCTTCCCTACCATCAAGTTC	TGTAGTCCTGCATGTTGTCCTTGG	nu	Other	3	Cre01.g033550	Protein disulfide isomerase
RF1	TGGGATCAGAGGATCTCAACGG	TGTACTGCCTGTACGACACAGC	nu	Ribo	2	Cre01.g048150	Translation release factor
mtNEP	AGGATGGCTGTGTGTGTGTGTG	ACCCTGCAAACAAACCCTGTTCTC	nu	Other	2	Cre02.g075600	Mitochondrial RNA polymerase
EFG1	GTCTGCAGTCCTCTTTCAAGGC	TCCAGAGTCTTCTCACGACGAG	nu	Ribo	1	Cre02.g076250	Translation elongation factor
PSBX	CGTGAGGTCTGTCATCGGATTC	AAACATCCTCAACGCGAGTACC	nu	PS	3	Cre02.g082750	PSII
PSRP3	AGACAACACAGCTGGTAGTGGAG	ATACGCGCCATACCCATGACAG	nu	Ribo	2	Cre02.g083950	Ribosome
TPR6	AGCTGAACAAGGTCACCAAGGC	TGGCAGCAGTCTGGTACACATC	nu	Other	3	Cre02.g106850	Tetratricopeptide repeat protein
RBCS2	ATACTGCTCTCAAGTGCTGAAGCG	AAAGACTGATCAGCACGAAACGG	nu	PS	2	Cre02.g120150	Rubisco
ROC81	ATTCCAGCCAGGAGCTCTTCTTC	ACTTGTTGACCTTCTCCACATCGC	nu	Other	1	Cre02.g140700	Chloroplast circadian rhythm
RRF1	TGAAGAAGGTGGACAAGGTTGAGC	ACGTGTCAGTCAGCTTCTGGATG	nu	Ribo	2	Cre03.g156050	Ribosome release factor
PSAI	ACGCACTCGGCATCAAACCTTG	AGTGGTTGTTCGTCCGGAGTTG	nu	PS	3	Cre03.g165100	PSI
CHLAMY1 C3	AAGCTGTTTGTCGGCCAGATCC	CGTTGCCCTTGTTGAGTACGTG	nu	Other	2	Cre03.g177200	Circadian clock
RPOD	CATGGATGTCGAGAGCCTGAAG	ACACCGTCATGACCAGCTTGTAG	nu	PEP	2	Cre03.g194950	Plastid-encoded RNA polymerase sigma factor
PHT1	TTGGTCACAACTGCCGCTTC	TGATGGCGTCCCTGATCTTCTG	nu	Other	2	Cre03.g199000	Light sensing
PRPL35	ATCCGCGACTCGTCCAAGATGTTC	GCTGCTGCGGGTTTAGGCATTTAC	nu	Ribo	2	Cre03.g210050	Large ribosomal subunit
IF1	TTGACTGCACGCGGATGTATGG	ACGTCAGATGTGACACGGAGAG	nu	Ribo	2	Cre04.g218700	Translation initiation factor
ATPC	AGCAGTACAACATCGTCAAGTCC	TCCGACTCCTGAGCAATGAACG	nu	PS	3	Cre06.g259900	ATP synthase
PRPS15	CTATTCTGAGCCAGCGCAAGTC	ATACGGTCGTACATGTCCCTGTC	nu	Ribo	2	Cre06.g264300	Small ribosomal subunit
PRPL13	TGTACATTCGCGGCAAGCAC	AGCGTTGATAACGATAACGTAGGC	nu	Ribo	2	Cre06.g264350	Large ribosomal subunit
LHCA1	TGTGAGCAACGTGAGAGCAAGG	ACCACCACAAGACCAACCAACAC	nu	PS	3	Cre06.g283050	Light harvesting complex
EFG3	AGCTGGTGATTGTGGAGCTACTGG	TGTGCAGCATGGACTTGTAGCC	nu	Ribo	1	Cre06.g284750	Translation elongation factor
CPH1	AAGACAGCCGTTGTGTGGTTCC	GGTATCACATTGGGTGCTGCTG	nu	Other	2	Cre06.g295200	Cryptochrome
MRL1	CAGGAGCTGAACAAACCCATGC	ATGAAGGACGAGTAGTGCCACCTC	nu	Other	2	Cre06.g298300	rbcL stability factor
PRPL27	CGCACTCAATGTGGAGCGAAAG	CCGCAAATTAAGACGCTCCTCTCC	nu	Ribo	2	Cre06.g300800	Large ribosomal subunit
RF2	GCCGGGTGATTCATGTTTGTGC	AGCGCATTTACCCTTGCATTTACC	nu	Ribo	2	Cre06.g303000	Translation release factor
IF2	AGAACACGGTCAAGGTGGTTGC	AATGTCCTCCTCCGTGACGAACTC	nu	Ribo	2	Cre07.g341850	Translation initiation factor
TAB3	CACAGATGTACTCGGTGTAGCG	ACCGAGGTTCTTCAGTGATGGC	nu	Other	3	Cre07.g348800	psaB translation factor
MCA1	AGCAGTTCGTGTGGCTGTGATG	ACTCAATCGAGTCCCTCTGTGC	nu	Other	1	Cre08.g358250	petA stability factor
TDA1	TGCGTAGATGCCTGCTTGACAAC	CGCGCAGAAACTTCCTTGCTTC	nu	Other	2	Cre08.g358350	atpA translation factor
RAA1	ACAGGAGTGGATGCTTGCGTTG	ACAGGCCCTCTGTGTCAAACTG	nu	Other	3	Cre09.g394150	psaA trans-splicing
PRPS1	AAGTTCCTGGAGGTCGATGAGGAG	TTGAAGCCCTGGATGTCGTTGGAC	nu	Ribo	2	Cre09.g394750	Small ribosomal subunit
NMD	TGGAAGAAGACCGTCAAGGTTGCC	CCGGAAGCAAGCATGAATAGCAGG	nu	Other	1	Cre09.g410700	Normalisation
TCA1	GCGTGTTCACGCATTTGTGTTTC	TGACGATCCCAAACCGACCAAG	nu	Other	2	Cre09.g415500	petA translation factor
PRPL6	AGAAGCGCATGGAGATGGTTGG	ACGTTCAGGGTCAGATCCTTGC	nu	Ribo	2	Cre09.g415950	Large ribosomal subunit
MBB1	TGCAGCAGAAGCGCTATGATGAAG	TGGGTTGACGTTGCCTGTATTGG	nu	Other	3	Cre09.g416200	psbB stability factor
PSAE	ACGACGAACAACTACGCTCTGG	CGCGAAGCCAGCCATTTACTTG	nu	PS	3	Cre10.g420350	PSI
PSB28	GGCAAAGTTCATCAACGGCAAGC	TGAAGCGATCCCACTCGAACTG	nu	PS	1	Cre10.g440450	PSII
MBD1	ACAAGGCGCGATTGCTGTTC	CCTCAAAGCGAGCGTACATGTTG	nu	Other	2	Cre10.g456300	psbD stability factor
PSBW	TGTGGTGTGGTTGTGGATACTGG	ACATCGTGGTGCGTGCTTCTTG	nu	PS	3	Cre11.g475250	PSII
MCD1	AACATGGTCCCATGATGAGCAG	CATGAGGTGGATGAGCAAGCAAG	nu	Other	2	Cre11.g476100	petD stability factor
ATPG	ACGTGAGCGCCATGATCAACAC	TTAGCCTTGGCCTCGTTGTAGG	nu	PS	1	Cre11.g481450	ATP synthase
RBP40	TGACAACCGCAACAACAAGCAGAC	ACAACAGCTCGTTGAGCCACTC	nu	Other	2	Cre12.g483700	psbD translation factor
PRPS20	ACCCGCGTGAAGAAGGTTGTCAAG	TCCGTGTAAGCCTCCGAAATCAGC	nu	Ribo	2	Cre12.g494750	Small ribosomal subunit
CLPP4	TGGATATTGAGATCCAGGCCAAGG	ATGATGCGGTTCAGGTTGGC	nu	Other	2	Cre12.g500950	Protease
EFTS	TTCGGCGCTTTCGTGAACTTCG	AGACGCCAGCTTGGAAATGTGC	nu	Ribo	2	Cre12.g519249	Translation elongation factor
RAA3	AACCCGCTTGTAGAGCTGAAGTTG	ATCCAGCTGCGGAAACAGTGAC	nu	Other	2	Cre12.g531050	psaA trans-splicing
PETM	TGGTTGAGGAGGGCAAGATCTAAG	ATGCAGACCCACACAAGGACAC	nu	PS	2	Cre12.g546150	Cyt b6f
BTUB	CCCCCGCCTGCACTTCTTC	GTCGGCGGCGCACATCAT	nu	Other	3	Cre12.g549550	Normalisation
PETO	TTAGGGTTTCCGAAGGGCAGTG	AGCACGCTCCAGTTCATATTCCG	nu	PS	1	Cre12.g558900	Cyt b6f
PSAG	TCAATGAGGCGAAGCAGCAAGC	AAGACCCAAACGGCCAGCATTG	nu	PS	3	Cre12.g560950	PSI
TBA1	GTCATGAAGAAGGCTTTCGACGAG	AGGAGTCCAGAGACAGAGTCTTGC	nu	Other	3	Cre13.g578750	psbA translation factor
VIPP1	ACACGTGCTGCGGACTGTAAAC	TGTGCAGTGGCATTAGCGTTCAG	nu	Other	2	Cre13.g583550	Thylakoid biogenesis
CRY	AAGCCACACACTGTATGACACG	TGGTGAACGACTGCATGGTGAG	nu	Other	2	Cre13.g600850	Cryptochrome
Actin	CTGACTCTGCGCTACCCCATT	CCTCAGTCAGCAGCACGGG	nu	Other	3	Cre13.g603700	Normalisation
EFG7	TTGCCTCATCGGATTCAAGAGC	ATTGCAGGAACACGCGGTTTAG	nu	Ribo	1	Cre13.g606000	Translation elongation factor
PETN	CCTGCGTGATGTTCTCGTTCTC	CCCGCAAGCGAGCAATTTACAG	nu	PS	1	Cre16.g650100	Cyt b6f
RAA2	CATGCGCACATTGGACATGGAG	TGATCGCGTCCATACCAAACCG	nu	Other	2	Cre16.g665750	psaA trans-splicing
EFP	TCTTCGTTCGACCCAGGTGTTC	TCAGACCGTTCTTGAAGTCGTTCG	nu	Ribo	2	Cre16.g691000	Translation elongation factor
EFP1	TCTTCGTTCGACCCAGGTGTTC	TCAGACCGTTCTTGAAGTCGTTCG	nu	Ribo	2	Cre16.g691000	Translation elongation factor
TAB2	CCGCTGCTTCACTGTCATGTCTTG	TCCTGCTTGTACACCGACTCTAGC	nu	Other	1	Cre17.g702500	psaB translation factor
PETC	CGTAAATCCGCTCCTGCTACTG	TGGCTGAGAGAGACAATCAACACG	nu	PS	3	Cre18.g744400	Cyt b6f
PSAD	TAGGCACGTCGACTTGGTTTGC	GCTCACGCACACGCTAACATCTAC	nu	PS	1	g5492	PSI
CBLP	GCCACACCGAGTGGGTGTCGTGCG	CCTTGCCGCCCGAGGCGCACAGCG	nu	Other	2	g6364	Normalisation
TBC2	TGGCACGTGAATCCAGCATTTG	TCGCTCTCGCAGTTACCATCTTC	nu	Other	2	g9611	psbC translation factor
RAA4	TGCTGATTTGGAGGAGCAGAAAC	CGAATAATGTGCAGGAACAACTGG	nu	Other	2	g9658	psaA trans-splicing
PSBO	CCGCTGCTCTCAGTCAATAACAGG	ACACGCCTCATGACTAATCTGTGC	nu	PS	1	g9830	PSII
ATPD	AGTATGGCAGCAGCCAGATTGAC	CCAGCTGGAAGTTTACGACAGC	nu	PS	1	g11498	ATP synthase
PSAK	AGCTGGTGGACTCCAAGAACTC	TTACAGAGCGCCAATGCCCTTC	nu	PS	3	g17518	PSI
